# Supplementary material for: Charge-induced electromechanical actuation of two-dimensional hexagonal and pentagonal materials
Source: Royal Society of Chemistry journal article supplement (doi:10.1039/c9cp03129d), 2019-01-01
Supplement: c9cp03129d1.pdf [file c9cp03129d1.pdf]

## Supporting Information to:

# Charge-induced electromechanical actuation of two-dimensional hexagonal and pentagonal materials

Vuong Van Thanh<sup>a,d</sup>, Do Van Truong<sup>b</sup>, Nguyen Tuan Hung<sup>c</sup>

<sup>a</sup> Department of Design of Machinery and Robot, School of Mechanical Engineering, Hanoi University of Science and Technology, Hanoi, Vietnam.

E-mail: [thanh.vuongvan@hust.edu.vn](mailto:thanh.vuongvan@hust.edu.vn)

<sup>b</sup> Department of Mechatronics, School of Mechanical Engineering, Hanoi University of Science and Technology, Hanoi, Vietnam

<sup>c</sup> Frontier Research Institute for Interdisciplinary Sciences, Tohoku University, Sendai 980-8578, Japan;

E-mail: [nguyen@flex.phys.tohoku.ac.jp](mailto:nguyen@flex.phys.tohoku.ac.jp)

## 2. Methodology

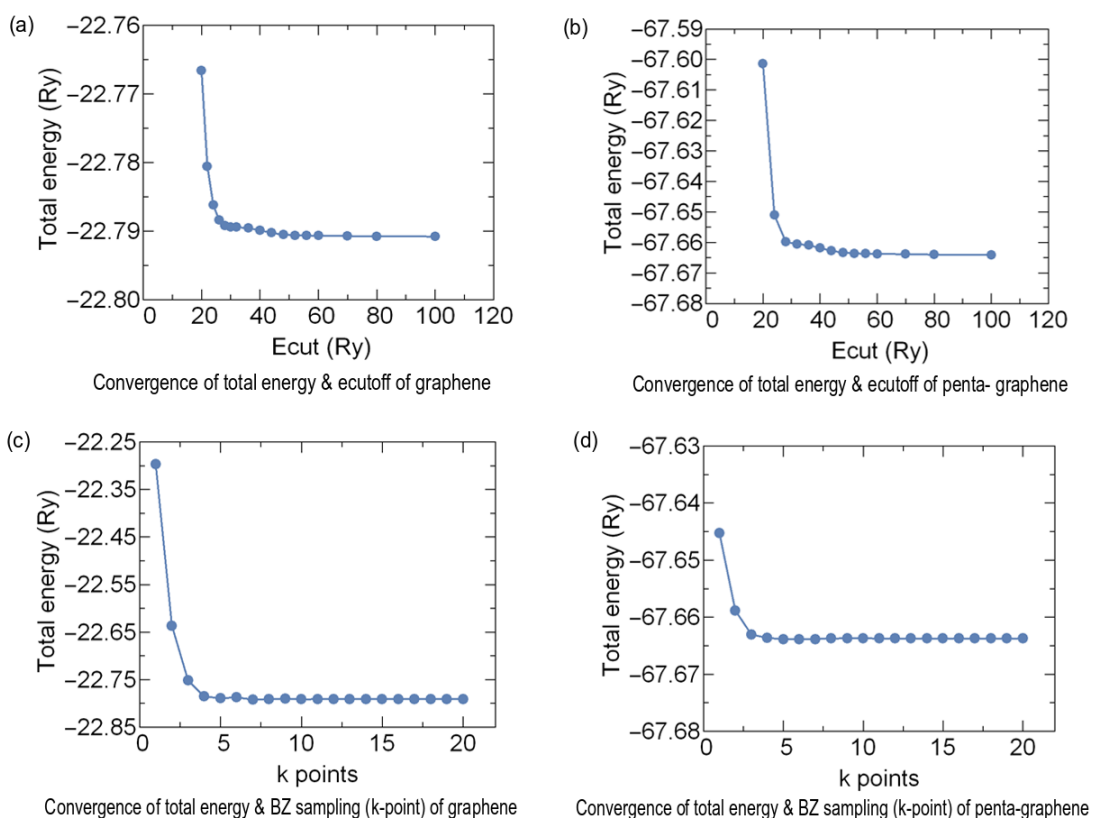

Fig. S1. Convergence of total energy and energy-cutoff of (a) graphene and (b) penta-graphene. Convergence of total energy and grid size (k-point) of (c) graphene and (d) penta-graphene.

### 3. Results and discussion

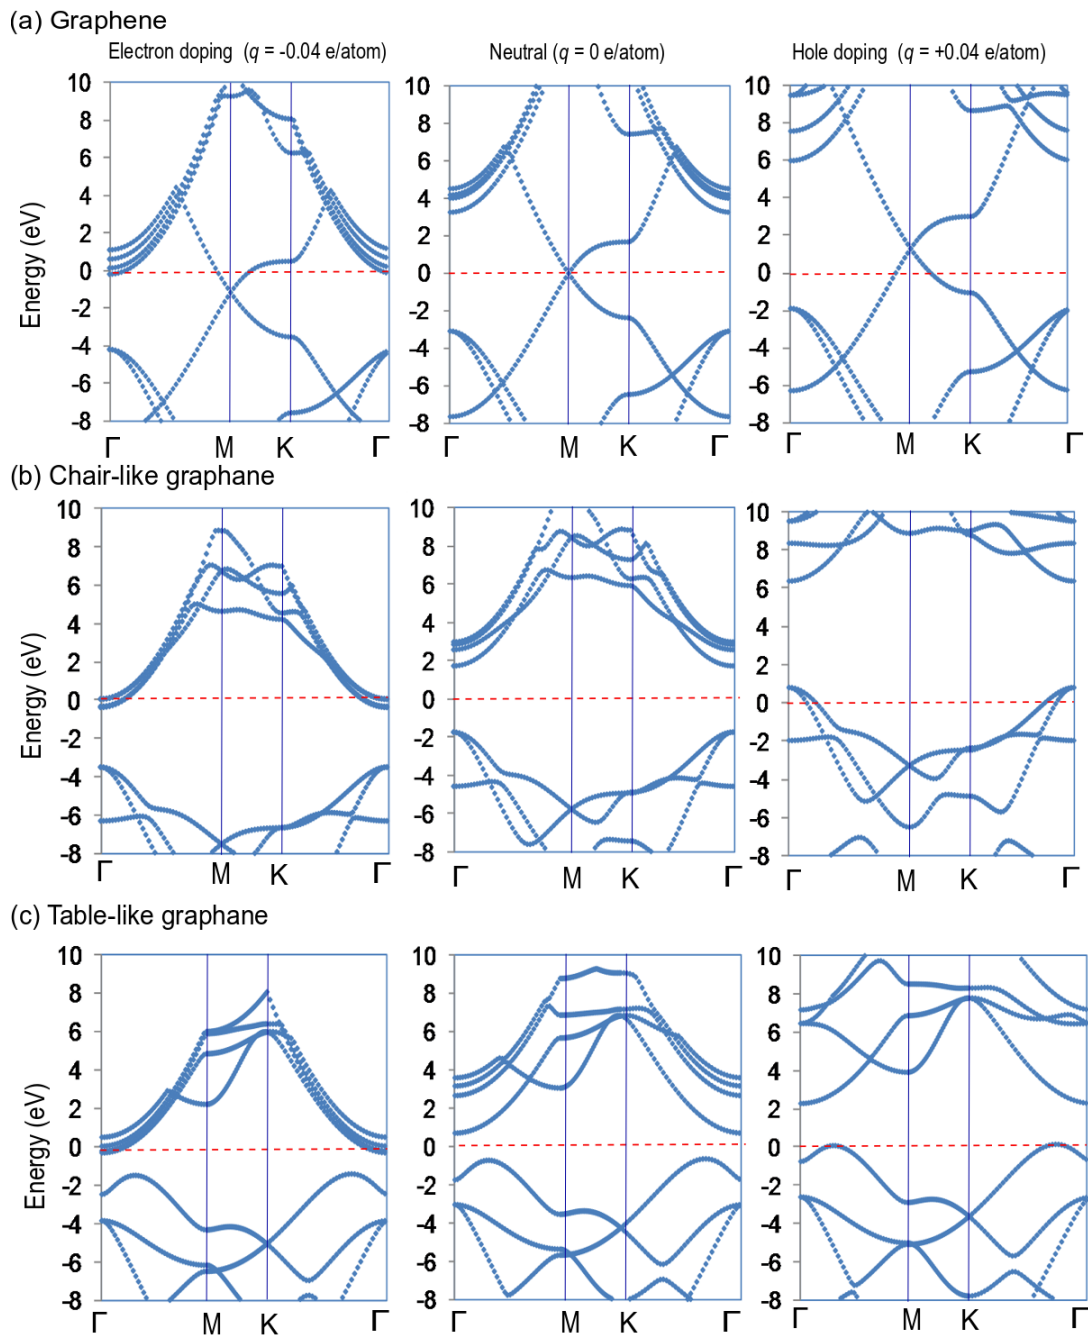

Fig. S2. Band structure of 2D materials: (a) graphene, (b) chair-like graphane and (c) table-like graphane. The Fermi energy (dashed line) is set to zero for all plots.

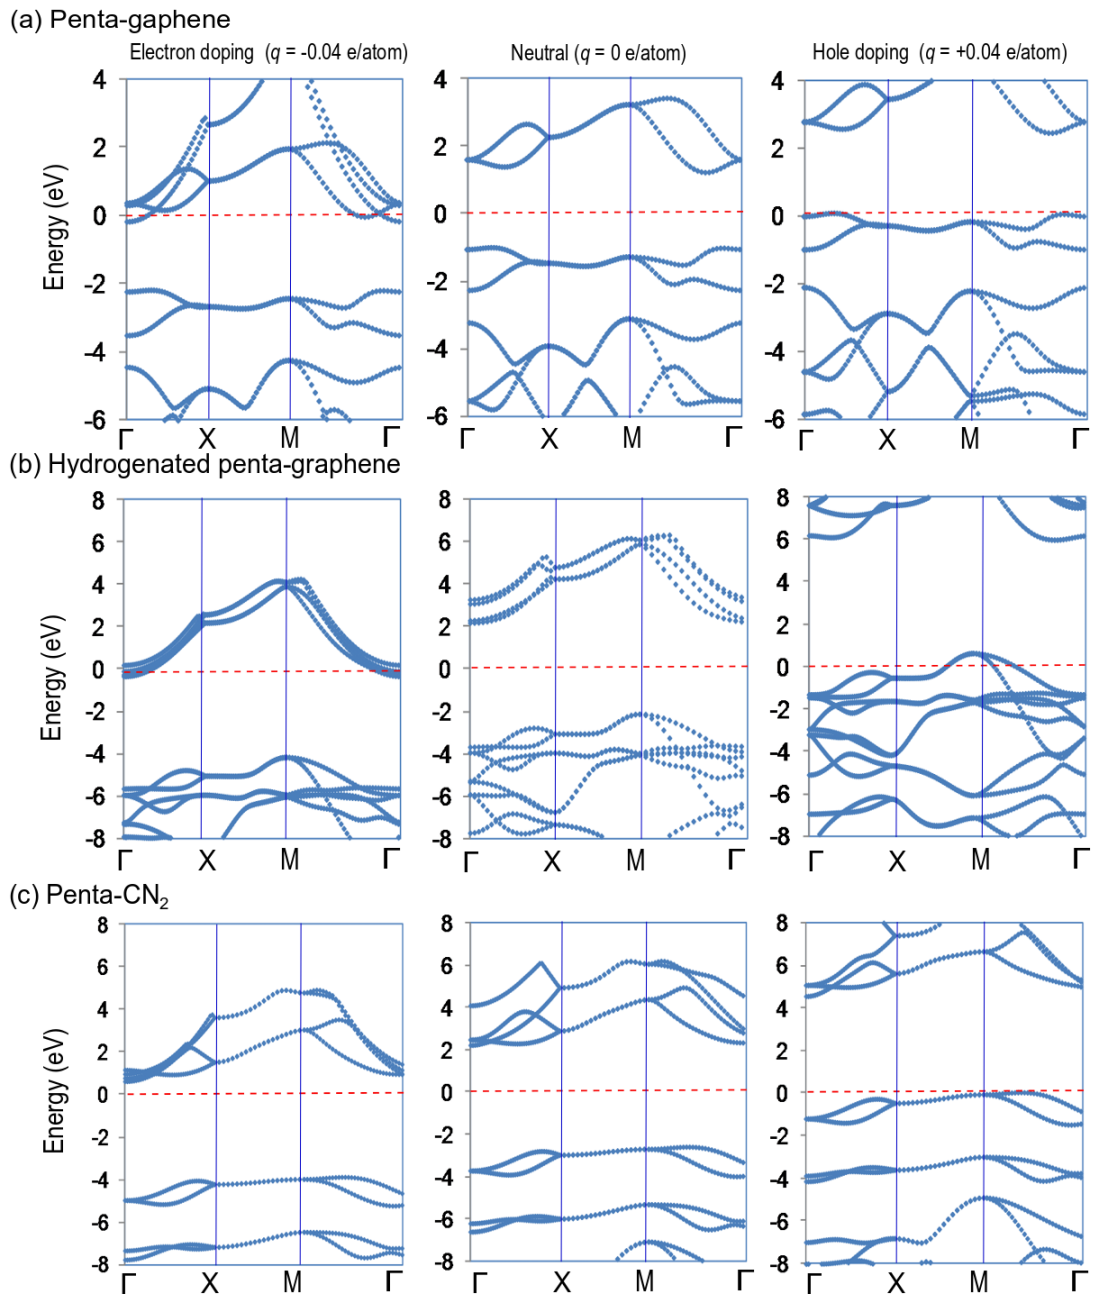

Fig. S3. Band structure of 2D materials: (a) penta-graphene; (b) hydrogenated penta-graphene and (c) penta-CN<sub>2</sub>. The Fermi energy (dashed line) is set to zero for all plots.
